# Supplementary material for: Coordination of EZH2 and SOX2 specifies human neural fate decision
Source: PubMed Central journal article supplement (PMC8421500; doi:10.1186/s13619-021-00092-6), 2021-09-06

# Supplementary Figure 1

**a**

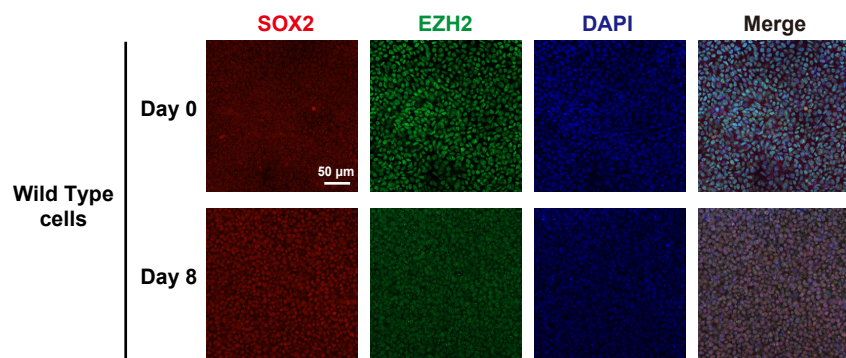

**b**

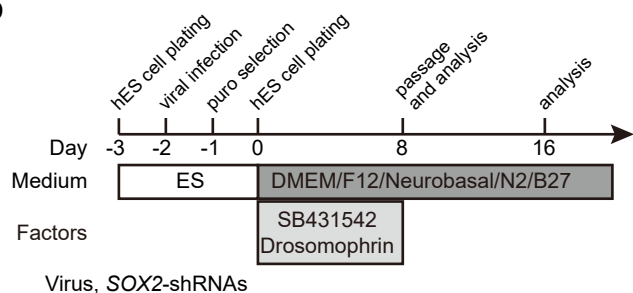

**c**

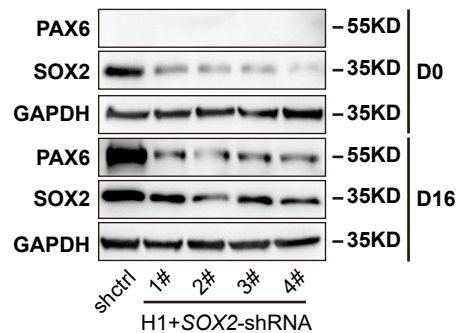

**d**

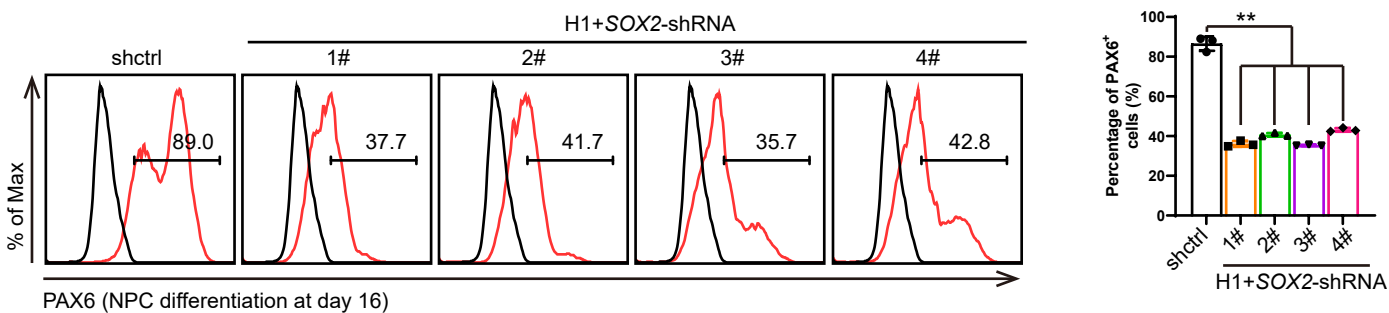

**e**

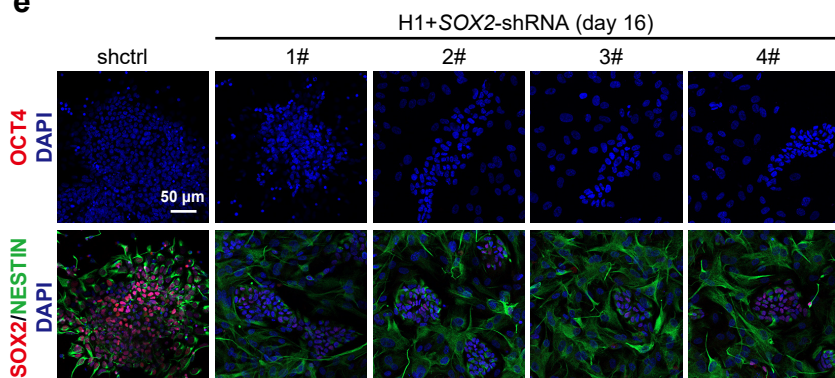

**f**

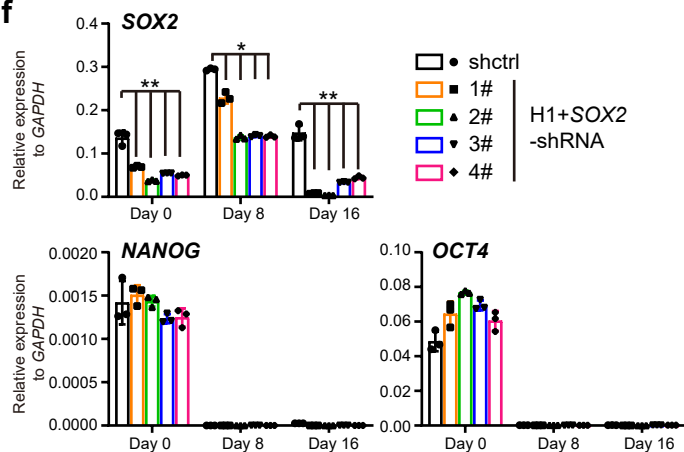

**g**

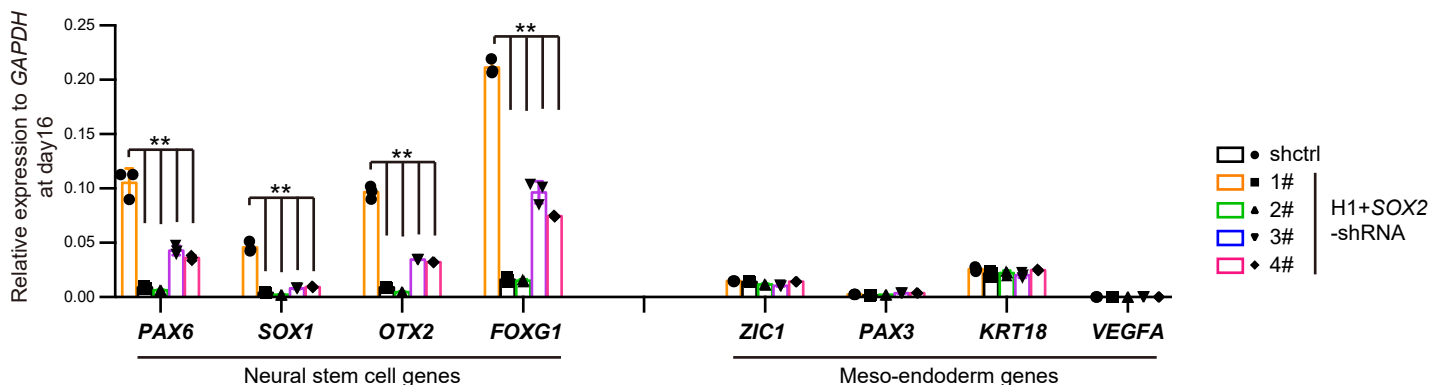

Supplement: 13619_2021_92_MOESM1_ESM.pdf [file 13619_2021_92_MOESM1_ESM.pdf]
