# Supplementary material for: Coordination of EZH2 and SOX2 specifies human neural fate decision
Source: PubMed Central journal article supplement (PMC8421500; doi:10.1186/s13619-021-00092-6), 2021-09-06
Supplement: 13619_2021_92_MOESM2_ESM.pdf [file 13619_2021_92_MOESM2_ESM.pdf]

## Supplementary Table 1 Primer sequences for this manuscript

| Genes        | Forward primer sequence | Reverse primer sequence  |
|--------------|-------------------------|--------------------------|
| GAPDH        | GGAGCGAGATCCCTCCAAAAT   | GGCTGTTGTCATACTTCTCATGG  |
| OCT4         | CCTCACTTCACTGCACTGTA    | CAGGTTTTCTTTCCCTAGCT     |
| NANOG        | TGAACCTCAGCTACAAACAG    | TGGTGGTAGGAAGAGTAAAG     |
| SOX2         | CCCAGCAGACTTCACATGT     | CCTCCCATTTCCCTCGTTTT     |
| SOX1         | AATTTTATTTTCGGCGTTGC    | TGGGCTCTGTCTCTTAAATTTGT  |
| PAX6         | ATGTGTGAGTAAAATTCTGGGCA | GCTTACAACCTTCTGGAGTCGCTA |
| FOXP1        | GAGCGACGACGTGTTTCATC    | GCCGTTGTAACCTCAAAGTGCTG  |
| CDH1         | GCTGGACCGAGAGAGTTTTCC   | CGACGTTAGCCTCGTTCTCA     |
| ZIC1         | ACATGAAGGTCCACGAATCCT   | CTTGTGGTCGGGTTGTCTGT     |
| PAX3         | AGCTCGGCGGTGTTTTTATCA   | CTGCACAGGATCTTGGAGACG    |
| ERBB3        | GGTGATGGGGAACCTTGAGAT   | CTGTCACTTCTCGAATCCACTG   |
| TFAP2A       | GACTCGGAGACCTCTCGATCC   | GACGGCATTGCTGTTGGAC      |
| FOXD3        | AGCCTAGTGAAGCCGCCTTACT  | TTGTGGAACATGTCCTCGGACT   |
| BMP4         | CGTCCAAGCTATCTCGAGCC    | CGGAATGGCTCCATAGGTCC     |
| KDR          | GAGGGGAACCTGAAGACAGGC   | GGCCAAGAGGCTTACCTAGC     |
| CXCL12       | GCCCTTCAGATTGTAGCCCG    | GTAAGGGTTCCTCAGGCGTC     |
| FOXH1        | CCCCCAGAGGCAGAGTCG      | GACCTGACGGATGATCTGGG     |
| KRT8         | CTCAAAGGCCAGAGGGCTTC    | ACTTGGCGTTGGCATCCTTA     |
| KRT18        | GAGGGCTCAGATCTTCGCAA    | CCAGCTGCAGTCGTGTGATA     |
| KRT19        | GTTACACCAGCCGGACTGAA    | GCAGGTCAGTAACCTCGGAC     |
| VEGFA        | TCACCATGCAGATTATGCGGA   | TACCGGGATTTCTTGCGCTT     |
| CLDN6        | TTATCTCCTTCGCAGTGCAGCTC | CACGATGCTGTTGCCGATGA     |
| OTX2         | CAAAGTGAGACCTGCCAAAAGA  | TGGACAAGGGATCTGACAGTG    |
| EZH2         | GCAGGCTGGGGGATTTTTATCA  | AACGAATTTTGTTACCCTTGCGG  |
| DLX5         | CAGCCAAAGCTTATGCCGAC    | CGGTCACTTCTTTCTCTGGCT    |
| SOX2-shRNA1# | CAGCTCGCAGACCTACATGAA   |                          |
| SOX2-shRNA2# | CGCTCATGAAGAAGGATAAGT   |                          |
| SOX2-shRNA3# | GTACAGTATTTATCGAGATAA   |                          |
| SOX2-shRNA4# | AGGAGCACCCGGATTATAAAT   |                          |

**Supplementary Table 2 Antibody information for this manuscript**

| Name      | Company     | Cat. #    | Host   | Dilution |
|-----------|-------------|-----------|--------|----------|
| SOX2      | R&D         | mab2018   | Mouse  | 1:1000   |
| PAX6      | Biologend   | PRB-278P  | Rabbit | 1:1000   |
| FLAG      | Sigma       | F1804     | Mouse  | 1:1000   |
| HRP-GAPDH | Proteintech | HRP-60004 | null   | 1:10000  |
| PAX6-488  | BD          | 561664    | Mouse  | 1:100    |
| NESTIN    | Millipore   | ABD69     | Rabbit | 1:1000   |
| MAP2      | CST         | 8707      | Rabbit | 1:1000   |
| GFAP      | Millipore   | MAB360    | Mouse  | 1:1000   |
| OCT4      | SantaCruz   | SC-5279   | Mouse  | 1:500    |
| TUBB3     | GeneTex     | GTX130245 | Rabbit | 1:1000   |
| EZH2      | CST         | 5246S     | Rabbit | 1:100    |
| H3K27me3  | Diagenode   | C15410069 | Rabbit | 1:100    |
| SOX2      | R&D         | AF2018    | Goat   | 1:100    |
